# Supplementary figures and images for: Effective Label-Free Sorting of Multipotent Mesenchymal Stem Cells from Clinical Bone Marrow Samples
Source: MDPI journal article supplement (doi:10.3390/bioengineering9020049), 2022-01-22

## Supplementary Materials

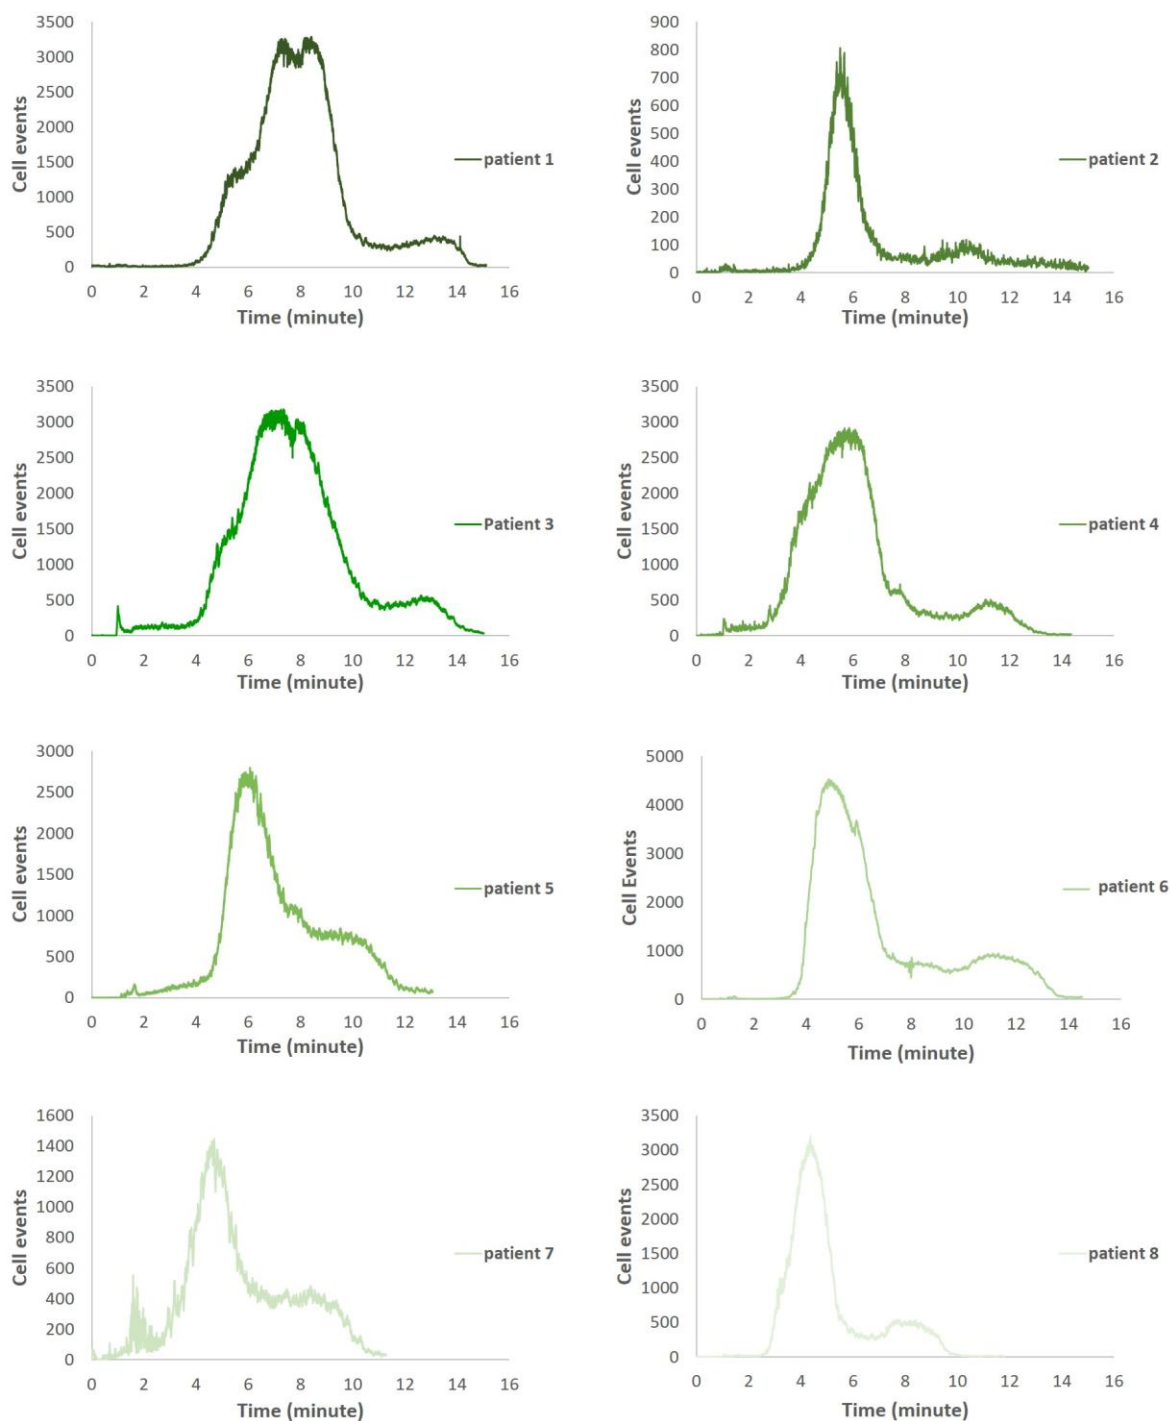

Figure S1. Selector® profiles of fresh BMC from the eight patients.

Supplement: s1 [file s1]
